# Supplementary material for: In situ changes of tropical crustose coralline algae along carbon dioxide gradients
Source: PubMed Central journal article supplement (PMC5381686; doi:10.1038/srep09537), 2015-04-02
Supplement: srep09537-s1.pdf [file srep09537-s1.pdf]

## ***In situ* changes of tropical crustose coralline algae along carbon dioxide gradients**

**K. E. Fabricius, A. Kluibenschedl, L. Harrington, S. Noonan, G. De'ath**

**Supplementary Table S1:** Seawater chemistry at the tiles from the three Control sites and five High CO<sub>2</sub> ('Seep') sites. Displayed are the number of tiles (N), and the site medians (and 5<sup>th</sup> and 95<sup>th</sup> percentiles) of the median values per tile. Abbreviations: TA = total alkalinity (in  $\mu\text{mol equivalents kg}^{-1}$ ),  $p\text{CO}_2$  = partial pressure of CO<sub>2</sub> in the seawater ( $\mu\text{atm}$ ),  $\Omega_{\text{Arag}}$  and  $\Omega_{\text{Calc}}$  = aragonite and calcite saturation state, DIC = dissolved inorganic carbon (in  $\mu\text{mol kg}^{-1}$ ).

| Reef    | Site    | N  | pH   |                                        | TA   |                                        | $p\text{CO}_2$ |                                        |
|---------|---------|----|------|----------------------------------------|------|----------------------------------------|----------------|----------------------------------------|
|         |         |    | med  | (05 <sup>th</sup> , 95 <sup>th</sup> ) | med  | (05 <sup>th</sup> , 95 <sup>th</sup> ) | med            | (05 <sup>th</sup> , 95 <sup>th</sup> ) |
| Dobu    | Control | 15 | 7.99 | (7.97, 8.10)                           | 2235 | (2219, 2262)                           | 442.4          | (304.3, 469.4)                         |
|         | Seep 1  | 14 | 7.67 | (7.19, 7.95)                           | 2290 | (2274, 2309)                           | 781.7          | (535.7, 2656)                          |
|         | Seep 2  | 14 | 7.73 | (7.39, 7.92)                           | 2291 | (2268, 2313)                           | 1183           | (684.9, 1962)                          |
| Esa'Ala | Control | 15 | 8.03 | (7.97, 8.08)                           | 2260 | (2253, 2280)                           | 309.5          | (257.8, 483.8)                         |
|         | Seep 1  | 15 | 8.02 | (7.96, 8.07)                           | 2289 | (2287, 2293)                           | 290.8          | (275.5, 291.7)                         |
| Upa-U.  | Control | 15 | 8.00 | (7.92, 8.09)                           | 2271 | (2223, 2336)                           | 342.5          | (301.5, 516.9)                         |
|         | Seep 1  | 15 | 7.83 | (7.41, 7.98)                           | 2290 | (2242, 2365)                           | 634.8          | (491.5, 1196)                          |
|         | Seep 2  | 13 | 7.84 | (7.62, 7.97)                           | 2309 | (2275, 2338)                           | 604.5          | (466.4, 778.7)                         |

| Reef    | Site    | $\Omega_{\text{Calc}}$ |                                        | $\Omega_{\text{Arag}}$ |                                        | DIC  |                                        |
|---------|---------|------------------------|----------------------------------------|------------------------|----------------------------------------|------|----------------------------------------|
|         |         | med                    | (05 <sup>th</sup> , 95 <sup>th</sup> ) | med                    | (05 <sup>th</sup> , 95 <sup>th</sup> ) | med  | (05 <sup>th</sup> , 95 <sup>th</sup> ) |
| Dobu    | Control | 5.31                   | (4.80, 6.55)                           | 3.56                   | (3.20, 4.40)                           | 1927 | (1851, 1945)                           |
|         | Seep 1  | 3.49                   | (1.47, 4.50)                           | 2.32                   | (0.98, 2.98)                           | 2113 | (2026, 2250)                           |
|         | Seep 2  | 2.87                   | (1.79, 4.11)                           | 1.92                   | (1.20, 2.74)                           | 2147 | (2062, 2231)                           |
| Esa'Ala | Control | 6.73                   | (5.09, 7.24)                           | 4.52                   | (3.41, 4.85)                           | 1873 | (1829, 1965)                           |
|         | Seep 1  | 7.27                   | (7.12, 7.30)                           | 4.89                   | (4.79, 4.93)                           | 1863 | (1849, 1863)                           |
| Upa-U.  | Control | 6.20                   | (4.79, 6.77)                           | 4.11                   | (3.20, 4.57)                           | 1925 | (1869, 1967)                           |
|         | Seep 1  | 3.93                   | (2.82, 5.03)                           | 2.61                   | (1.88, 3.36)                           | 2047 | (1980, 2196)                           |
|         | Seep 2  | 4.31                   | (3.89, 5.03)                           | 2.87                   | (2.61, 3.36)                           | 2063 | (1986, 2115)                           |

**Supplementary Table S2:** Difference in seawater chemistry values (medians) between Seep and Control sites (Fig. 1), and between the three reefs. Analysis of deviance tables, based on generalized linear models with log-link function and quasipoisson distribution.

|                            | <b>Df</b> | <b>Deviance</b> | <b>Residual<br/>Df</b> | <b>Residual<br/>Deviance</b> | <b>F</b> | <b>P</b> |
|----------------------------|-----------|-----------------|------------------------|------------------------------|----------|----------|
| Response: pH               |           |                 |                        |                              |          |          |
| NULL                       | 115       | 0.3959          |                        |                              |          |          |
| Site2                      | 1         | 0.1469          | 114                    | 0.2491                       | 126.1    | <0.0001  |
| Reef                       | 2         | 0.1182          | 112                    | 0.1309                       | 50.71    | <0.0001  |
| Response: Omega calcite    |           |                 |                        |                              |          |          |
| NULL                       | 115       | 56.60           |                        |                              |          |          |
| Site2                      | 1         | 15.80           | 114                    | 40.79                        | 120.4    | <0.0001  |
| Reef                       | 2         | 25.64           | 112                    | 15.15                        | 97.69    | <0.0001  |
| Response: Omega Aragonite  |           |                 |                        |                              |          |          |
| NULL                       | 115       | 38.24           |                        |                              |          |          |
| Site2                      | 1         | 10.55           | 114                    | 27.69                        | 119.1    | <0.0001  |
| Reef                       | 2         | 17.48           | 112                    | 10.21                        | 98.65    | <0.0001  |
| Response: $p\text{CO}_2$   |           |                 |                        |                              |          |          |
| NULL                       | 115       | 22142           |                        |                              |          |          |
| Site2                      | 1         | 7430.4          | 114                    | 1471                         | 123.1    | <0.0001  |
| Reef                       | 2         | 8669.5          | 112                    | 6041.6                       | 71.80    | <0.0001  |
| Response: Total Alkalinity |           |                 |                        |                              |          |          |
| NULL                       | 115       | 32.56           |                        |                              |          |          |
| Site2                      | 1         | 18.77           | 114                    | 13.75                        | 213.0    | <0.0001  |
| Reef                       | 2         | 3.877           | 112                    | 9.878                        | 21.99    | <0.0001  |
| Response: DIC              |           |                 |                        |                              |          |          |
| NULL                       | 115       | 690.7           |                        |                              |          |          |
| Site2                      | 1         | 281.7           | 114                    | 409.0                        | 224.0    | <0.0001  |
| Reef                       | 2         | 268.4           | 112                    | 140.6                        | 106.7    | <0.0001  |

**Supplementary Table S3:** Percent cover of crustose coralline algae (CCA) and other benthic groups on the reef and on the top- and bottom-sides of the settlement tiles at the High CO<sub>2</sub> and Control sites (Fig. 2). Ratios and their 95% confidence intervals are back-transformed logged values. Numerous groups of invertebrate phyla complement the values on the bottom-sides of the tiles to 100%. Differences between ratios are significant at the 5% level if the range between upper and lower confidence intervals of the ratios does not include the value 1.0.

|                                       | %<br>Control | (upper, lower<br>95% CI) | %<br>High<br>CO <sub>2</sub> | (upper,<br>lower<br>95% CI) | Ratio | (upper, lower<br>95% CI) |
|---------------------------------------|--------------|--------------------------|------------------------------|-----------------------------|-------|--------------------------|
| <b>Photo transects</b>                |              |                          |                              |                             |       |                          |
| CCA                                   | 6.65         | (4.43, 8.53)             | 2.22                         | (1.48, 3.34)                | 0.33  | (0.21, 0.54)             |
| Unoccupied                            | 30.2         | (25.1, 35.3)             | 24.1                         | (20.1, 29.0)                | 0.80  | (0.63, 1.02)             |
| <b>Top-sides tiles – 5 months</b>     |              |                          |                              |                             |       |                          |
| CCA                                   | 38.1         | (29.7, 43.3)             | 6.4                          | (5.0, 8.15)                 | 0.17  | (0.13, 0.22)             |
| Unoccupied                            | 22.8         | (20.3, 27.4)             | 36.0                         | (32.1, 40.4)                | 1.58  | (1.27, 1.96)             |
| Green filamentous algae               | 18.2         | (15.5, 22.8)             | 23.3                         | (19.9, 27.4)                | 1.28  | (0.97, 1.70)             |
| Turf algae                            | 17.8         | (14.5, 24.3)             | 26.0                         | (21.2, 31.8)                | 1.46  | (1.01, 2.12)             |
| Cyanobacteria                         | 2.32         | (1.89, 3.67)             | 6.9                          | (5.59, 8.51)                | 2.97  | (1.79, 4.91)             |
| Macroalgae                            | 0.84         | (0.58, 1.63)             | 1.7                          | (1.19, 2.51)                | 2.07  | (0.96, 4.44)             |
| <b>Top-sides tiles – 13 months</b>    |              |                          |                              |                             |       |                          |
| CCA                                   | 29.6         | (23.1, 35.6)             | 11.1                         | (8.65, 14.2)                | 0.37  | (0.27, 0.51)             |
| Unoccupied                            | 16.9         | (14.2, 20.0)             | 11.8                         | (9.99, 14.0)                | 0.70  | (0.55, 0.89)             |
| Green fil. algae                      | 14.3         | (12.0, 18.5)             | 21.7                         | (18.2, 25.9)                | 1.52  | (1.11, 2.08)             |
| Turf algae                            | 31.7         | (25.9, 40.7)             | 33.4                         | (27.3, 40.9)                | 1.05  | (0.76, 1.46)             |
| Cyanobacteria                         | 3.4          | (2.46, 6.65)             | 9.2                          | (6.62, 12.9)                | 2.70  | (1.29, 5.66)             |
| Macroalgae                            | 4.1          | (3.13, 7.50)             | 12.7                         | (9.60, 16.8)                | 3.07  | (1.59, 5.92)             |
| <b>Bottom-sides tiles – 5 months</b>  |              |                          |                              |                             |       |                          |
| CCA                                   | 23.5         | (17.3, 28.5)             | 5.9                          | (4.33, 7.95)                | 0.25  | (0.17, 0.36)             |
| Unoccupied                            | 21.1         | (17.7, 26.3)             | 19.5                         | (16.3, 23.2)                | 0.92  | (0.70, 1.22)             |
| Turf algae                            | 17.3         | (15.2, 20.8)             | 21.2                         | (18.7, 24.2)                | 1.23  | (0.98, 1.54)             |
| Cyanobacteria                         | 0.7          | (0.61, 2.40)             | 23.7                         | (20.1, 27.9)                | 33.1  | (9.77, 112.1)            |
| Macroalgae                            | 0.1          | (0.10, 2.05)             | 3.7                          | (2.47, 5.55)                | 26.0  | (1.76, 385.6)            |
| <b>Bottom-sides tiles – 13 months</b> |              |                          |                              |                             |       |                          |
| CCA                                   | 21.4         | (16.1, 25.9)             | 6.2                          | (4.69, 8.26)                | 0.29  | (0.21, 0.41)             |
| Unoccupied                            | 7.6          | (4.88, 11.3)             | 4.4                          | (2.84, 6.92)                | 0.58  | (0.32, 1.06)             |
| Turf algae                            | 7.6          | (5.65, 10.7)             | 7.2                          | (5.35, 9.74)                | 0.95  | (0.60, 1.49)             |
| Cyanobacteria                         | 0.7          | (0.58, 2.00)             | 25.1                         | (21.5, 29.2)                | 36.8  | (12.4, 109.6)            |
| Macroalgae                            | 0.3          | (0.28, 2.42)             | 22.8                         | (18.6, 28.0)                | 67.2  | (9.31, 483.3)            |

**Supplementary Table S4:** Relationship of specific taxonomic groupings of crustose coralline algae (CCA) on settlement tiles to pH. The first column shows the percentage of tiles with the taxon present. Consecutive columns show estimated cover at both 8.0 and 7.8 pH (with upper and lower 95% confidence intervals), the ratios of these estimates, the slope of change, and the significance of difference between the two pH levels (Fig. 4). The first four rows shows total cover of CCA (all taxa combined) on the top- and bottom-sides of the tiles after 5 and 13 months of deployment (5 M, 13 M). The rows below show estimates of the cover of specific CCA taxa on the bottom-sides after 13 months.

|                                                | % Present | Est. cover pH 8.0 | (Upper, lower 95% CI) | Est. cover pH 7.8 | (Upper, lower 95% CI) | Ratio cover pH 7.8/8.0 | Slope | t     | P      |
|------------------------------------------------|-----------|-------------------|-----------------------|-------------------|-----------------------|------------------------|-------|-------|--------|
| Total cover Top (5 M)                          | 92.0      | 25.9              | (21.8, 30.7)          | 9.30              | (6.72, 12.9)          | 0.36                   | 5.11  | 6.092 | <0.001 |
| Total cover Top (13 M)                         | 95.7      | 27.6              | (22.9, 33.4)          | 14.8              | (12.2, 18.0)          | 0.54                   | 3.12  | 5.428 | <0.001 |
| Total cover Bottom (5 M)                       | 74.1      | 17.9              | (15.4, 20.8)          | 4.66              | (3.29, 6.59)          | 0.26                   | 6.73  | 7.721 | <0.001 |
| Total cover Bottom (13 M)                      | 80.4      | 16.3              | (13.8, 19.3)          | 6.05              | (4.44, 8.22)          | 0.37                   | 4.97  | 6.238 | <0.001 |
| Unidentified spp.                              | 28.6      | 2.77              | (2.15, 3.57)          | 0.80              | (0.47, 1.38)          | 0.29                   | 6.19  | 4.524 | <0.001 |
| Successional spp.                              | 59.8      | 6.52              | (5.02, 8.46)          | 2.32              | (1.43, 3.77)          | 0.36                   | 5.16  | 4.117 | <0.001 |
| Unidentified sp. 1                             | 18.6      | 0.77              | (0.46, 1.32)          | 0.12              | (0.021, 0.62)         | 0.15                   | 9.55  | 2.345 | 0.021  |
| <i>Titanoderma prototypum</i>                  | 31.3      | 0.82              | (0.51, 1.33)          | 0.29              | (0.11, 0.72)          | 0.35                   | 5.29  | 2.235 | 0.027  |
| <i>Hydrolithon reinboldii</i>                  | 36.6      | 1.01              | (0.65, 1.58)          | 0.37              | (0.16, 0.83)          | 0.36                   | 5.05  | 2.398 | 0.018  |
| <i>Neogoniolithon</i> (cf. <i>frutescens</i> ) | 59.8      | 0.78              | (0.50, 1.21)          | 0.31              | (0.14, 0.66)          | 0.39                   | 4.67  | 2.319 | 0.022  |
| <i>Lithoporella melobesioides</i>              | 24.1      | 0.75              | (0.46, 1.22)          | 0.35              | (0.17, 0.74)          | 0.47                   | 3.82  | 1.923 | 0.057  |
| <i>Paragoniolithon conicum</i>                 | 48.2      | 2.44              | (1.79, 3.32)          | 1.38              | (0.92, 2.09)          | 0.57                   | 2.84  | 2.564 | 0.012  |
| <i>Porolithon onkodes</i> (Low)                | 5.4       | 0.06              | (0.02, 0.16)          | 0.03              | (0.005, 0.13)         | 0.48                   | 3.64  | 0.853 | 0.396  |
| <i>Lithophyllum kotschyannum</i>               | 4.5       | 0.29              | (0.09, 0.98)          | 0.002             | (0.000, 1.70)         | 0.01                   | 26.3  | 1.703 | 0.091  |
